# Supplementary material for: Implementation einer Sturzsensorik in der Langzeitpflege
Source: Springer Nature journal article supplement (doi:10.1007/s00391-023-02255-3), 2023-11-08
Supplement: MOESM1 [file 26278756]

## Teilstrukturierte Interviewleitfäden

### Teilstrukturierter Interviewleitfaden – Pflegefachkräfte

| Kategorien                                                        | Interviewfragen                                                                                                                                                                                                                                                                                                                                                 |
|-------------------------------------------------------------------|-----------------------------------------------------------------------------------------------------------------------------------------------------------------------------------------------------------------------------------------------------------------------------------------------------------------------------------------------------------------|
| 1. Erfahrungszeitraum mit der Sturzsensoren                       | 1.1. Wie lange arbeiten Sie bereits mit dem Sturzsensoren?                                                                                                                                                                                                                                                                                                      |
| 2. Erwartungen an die Sturzsensoren                               | 2.1. Wenn Sie an die Zeit zurückblicken, bevor der Sturzsensoren im Hause war: Welche Erwartungen hatten Sie daran? <ul style="list-style-type: none"> <li>• Auch auf Basis von vorangegangenen Herausforderungen in der frühzeitigen Sturzerkennung</li> <li>• Inwieweit haben sich diese Erwartungen erfüllt?</li> </ul>                                      |
| 3. Fördernde und hemmende Faktoren der Implementation             | 3.1. Welche Vor- und Nachteile erkennen Sie mittlerweile, nachdem der Sturzsensoren schon einige Zeit im Einsatz ist? Können Sie dies an konkreten Beispielen deutlich machen? <ul style="list-style-type: none"> <li>• Aufwand: Belastung vs. Entlastung</li> <li>• Funktionalität bzw. Genauigkeit der Prävention/Erkennung eines Sturzereignisses</li> </ul> |
| 4. Erfahrungen mit der Technologie                                | 4.1. Haben Sie Erfahrungen mit der Nutzung ähnlicher Technologien? Wie beurteilen Sie den Sturzsensoren im Vergleich?<br>4.2. Welche Probleme sind bislang in Bezug auf die Nutzung des Sturzsensors aufgekommen?                                                                                                                                               |
| 5. Nutzungskompetenzen                                            | 5.1. Sind aus Ihrer Sicht besondere Kompetenzen zur adäquaten Nutzung notwendig?                                                                                                                                                                                                                                                                                |
| 6. Rückmeldung von Angehörigen                                    | 6.1. Welche Rückmeldungen haben Sie ggf. von Angehörigen pflegebedürftiger Bewohner:innen zu dem Sturzsensoren erhalten?                                                                                                                                                                                                                                        |
| 7. Einsatz und Mehrwert für die ambulante pflegerische Versorgung | 7.1. Wenn Sie an das häusliche Umfeld denken: Könnte ihrer Meinung nach ein solcher Sturzsensoren auch in der ambulanten pflegerischen Versorgung einen Mehrwert bieten? <ul style="list-style-type: none"> <li>• Nennen Sie gerne ein Szenario für die erfolgskritischen Faktoren.</li> </ul>                                                                  |
| 8. Nutzungsakzeptanz und Zahlungsbereitschaft                     | 8.1. Auf Basis der Erfahrungen, die Sie bislang mit dem Sensor in dieser Einrichtung gemacht haben: Wären Sie für sich selbst oder für einen Angehörigen bereit, einen solchen Sturzsensoren zu nutzen? Warum oder warum nicht?<br>8.2. Wären Sie auch dazu bereit, einen Preis dafür zu bezahlen? Wenn ja, wie hoch wäre dieser?                               |

Teilstrukturierter Interviewleitfaden – Einrichtungsleitung

| Kategorien                                            | Interviewfragen                                                                                                                                                                                                                                                                                                                                                                                     |
|-------------------------------------------------------|-----------------------------------------------------------------------------------------------------------------------------------------------------------------------------------------------------------------------------------------------------------------------------------------------------------------------------------------------------------------------------------------------------|
| 1. Rahmeninformationen                                | 1.1. Wie groß ist ihre Einrichtung? (Anzahl Mitarbeiter:innen/Pflegekräfte, Anzahl Betten/Pflegebedürftige)<br>1.2. Wie viele professionell Pflegende arbeiten in der Einrichtung mit dem Sturzsensor?<br>1.3. Inwiefern sind andere Berufsgruppen im Umgang mit dem Sensor vertraut?                                                                                                               |
| 2. Beweggründe der Implementation                     | 2.1. Was waren die Beweggründe, den Sturzsensor in Ihrer Einrichtung zu nutzen?                                                                                                                                                                                                                                                                                                                     |
| 3. Erwartungen an die Sturzsensorik                   | 3.1. Wenn Sie an die Zeit zurückblicken, bevor der Sturzsensor im Hause war: Welche Erwartungen hatten Sie daran? <ul style="list-style-type: none"> <li>• Auch auf Basis von vorangegangenen Herausforderungen in der frühzeitigen Sturzerkennung</li> <li>• Inwieweit haben sich diese Erwartungen erfüllt?</li> <li>• Sollte der Sensor weitere Aufgaben oder Anforderungen erfüllen?</li> </ul> |
| 4. Fördernde und hemmende Faktoren der Implementation | 4.1. Welche Vor- und Nachteile erkennen Sie mittlerweile, nachdem der Sturzsensor schon einige Zeit im Einsatz ist? Können Sie dies an konkreten Beispielen deutlich machen? <ul style="list-style-type: none"> <li>• Aufwand: Belastung vs. Entlastung</li> <li>• Funktionalität bzw. Genauigkeit der Prävention/Erkennung eines Sturzereignisses</li> </ul>                                       |
| 5. Erfahrungen mit der Implementation und Technologie | 5.1. Wie bewerten Sie den Aufwand zur Installation und Implementierung der Sturzsensorik in Ihrer Einrichtung?<br>5.2. Haben Sie Erfahrungen mit der Nutzung ähnlicher Technologien? Wie beurteilen Sie den Sturzsensor im Vergleich?<br>5.3. Welche Probleme sind bislang in Bezug auf die Nutzung des Sturzsenors aufgekommen?                                                                    |
| 6. Nutzungskompetenzen und Schulungen                 | 6.1. Sind aus Ihrer Sicht besondere Kompetenzen zur adäquaten Nutzung notwendig?<br>6.2. Inwieweit gab es diesbezüglich Schulung?                                                                                                                                                                                                                                                                   |
| 7. Veränderungen durch die Implementation             | 7.1. Wie haben sich die Arbeitsabläufe und -anforderungen von professionell Pflegenden durch die Implementierung des Sturzsenors verändert?                                                                                                                                                                                                                                                         |
| 8. Rückmeldung von Angehörigen                        | 8.1. Welche Rückmeldungen haben Sie ggf. von Angehörigen pflegebedürftiger Bewohner:innen zu dem Sturzsensor erhalten?                                                                                                                                                                                                                                                                              |

|                                                                          |                                                                                                                                                                                                                                                                                                                                              |
|--------------------------------------------------------------------------|----------------------------------------------------------------------------------------------------------------------------------------------------------------------------------------------------------------------------------------------------------------------------------------------------------------------------------------------|
| <p>9. Einsatz und Mehrwert für die ambulante pflegerische Versorgung</p> | <p>9.1. Wenn Sie an das häusliche Umfeld denken: Könnte ihrer Meinung nach ein solcher Sturzsensor auch in der ambulanten pflegerischen Versorgung einen Mehrwert bieten?</p> <ul style="list-style-type: none"> <li>• Nennen Sie gerne ein Szenario für die erfolgskritischen Faktoren.</li> </ul>                                          |
| <p>10. Nutzungsakzeptanz und Zahlungsbereitschaft</p>                    | <p>10.1. Auf Basis der Erfahrungen, die Sie bislang mit dem Sensor in dieser Einrichtung gemacht haben: Wären Sie für sich selbst oder für einen Angehörigen bereit, einen solchen Sturzsensor zu nutzen? Warum oder warum nicht?</p> <p>10.2. Wären Sie auch dazu bereit, einen Preis dafür zu bezahlen? Wenn ja, wie hoch wäre dieser?</p> |
